# Supplementary material for: Asparagus officinalis Exhibits Anti-Tumorigenic and Anti-Metastatic Effects in Ovarian Cancer
Source: Frontiers journal article supplement (doi:10.3389/fonc.2021.688461), 2021-07-14
Supplement: Data_Sheet_1.pdf [file Data_Sheet_1.pdf]

# Inspection Report

Name: Heze Juxinyuan Food CO., LTD

NO. JXY-YP-2-180501

|                    |                                                               |                           |                                                             |                     |              |
|--------------------|---------------------------------------------------------------|---------------------------|-------------------------------------------------------------|---------------------|--------------|
| Sample             |                                                               | Condensed Asparagus Juice |                                                             | Amount              | 200Kg/Bucket |
| Date of production |                                                               | 2018. 4. 16               |                                                             | Date of detection   | 2018.4.25    |
|                    |                                                               |                           |                                                             | Basis               | GB/T 31121   |
| Result             |                                                               |                           |                                                             |                     |              |
| NO.                | Project                                                       | Unit                      | Standard                                                    | Result              | Decision     |
| 1                  | subjective inspection                                         | /                         | Color: even and milky                                       | Normal              | Qualified    |
|                    |                                                               |                           | Odor: with asparagus unique odor, peculiar smell.           |                     |              |
|                    |                                                               |                           | Impurities: No foreign impurities visible to the naked eye. |                     |              |
| 2                  | Net content                                                   | Kg                        | About 200                                                   | 200                 | Match        |
| 3                  | Soluble olid                                                  | %                         | 60-68                                                       | 62                  | Qualified    |
| 4                  | PH                                                            | /                         | 3. 6-5. 6                                                   | 4. 48               | Qualified    |
| 5                  | Total bacterial count                                         | cfu/ ml                   | W100                                                        | 11                  | Match        |
| 6                  | Coliform                                                      | MPN/100 ml                | W3                                                          | 0                   | Match        |
| 7                  | Mycete                                                        | cfu/ ml                   | W10                                                         | 2                   | Match        |
| 8                  | Accharomycetes                                                | cfu/ m                    | <10                                                         | 3                   | Match        |
| 9                  | Salmonella                                                    | /25g                      | n=5, c=0, m=0                                               | No Detection        | Qualified    |
| 10                 | Staphylococcus aureus                                         | Cfu/ml                    | n=5, c=1, m=100, M=1000                                     | <10/<10/<10/<10/<10 | Qualified    |
| 11                 | Benzoic acid and sodium benzoate （calculated as benzoic acid） | g/kg                      | W1.0                                                        | No Detection        | Qualified    |
| 12                 | sulfur dioxide                                                | g/kg                      | W0. 05                                                      | 0. 02               | Qualified    |
| 13                 | Sorbic acid and potassium salt （calculated as Sorbic acid）    | g/kg                      | W2.0                                                        | No Detection        | Qualified    |
| 14                 | Saccharin sodium (calculated as saccharin))                   | g/kg                      | No Detection                                                | No Detection        | Qualified    |
| 15                 | Acesulfame potassium                                          | g/kg                      | W0. 3                                                       | No Detection        | Qualified    |
| 16                 | Sodium cyclamate (calculated as cyclohexyl sulfamic acid)     | g/kg                      | W0. 65                                                      | No Detection        | Qualified    |

荷泽巨鑫源食品有限公司  
HEZEJUXIN YUAN FOOD CO., LTD

|        |                                                                                                                  |       |              |                   |           |
|--------|------------------------------------------------------------------------------------------------------------------|-------|--------------|-------------------|-----------|
| 17     | Tartrazine aluminum lake<br>(calculated as Tartrazine)                                                           | g/kg  | W0.1         | No Detection      | Qualified |
| 18     | Sunset yellow aluminum lake<br>(calculated as Sunset yellow)                                                     | g/kg  | W0.1         | No Detection      | Qualified |
| 19     | Brilliant blue aluminum lake<br>(calculated as Brilliant blue)                                                   | g/kg  | W0. 025      | No Detection      | Qualified |
| 20     | Poncean 4R Aluminum Lake<br>(calculated as Poncean)                                                              | g/kg  | WO. 05       | No Detection      | Qualified |
| 21     | Amaranth aluminum lake<br>(calculated as Amaranth)                                                               | g/kg  | W0. 05       | No Detection      | Qualified |
| 22     | total arsenic (As)                                                                                               | mg/kg | No Detection | No Detection      | Qualified |
| 23     | lead (Pb)                                                                                                        | mg/L  | WO. 05       | No Detection      | Qualified |
| 24     | cadmium (Cd)                                                                                                     | mg/kg | W0.5         | No Detection      | Qualified |
| 25     | iron                                                                                                             | mg/L  | W15          | 5.0               | Qualified |
| 26     | copper                                                                                                           | mg/L  | W5           | 3.9               | Qualified |
| 27     | tin                                                                                                              | mg/L  | 200          | <20.0             | Qualified |
| 28     | zinc                                                                                                             | mg/L  | W5           | 1.5               | Qualified |
| 29     | Hexachlorocyclohex-ane                                                                                           | mg/kg | WO. 2        | No Detection      | Qualified |
| 30     | Chlorophenothane                                                                                                 | mg/kg | W0. 2        | No Detection      | Qualified |
| 31     | Dicofol                                                                                                          | mg/kg | W1.0         | No Detection      | Qualified |
| 32     | Fenvalerate                                                                                                      | mg/kg | W0. 5        | No Detection      | Qualified |
| 33     | Dichlorvos                                                                                                       | mg/kg | WO. 1        | No Detection      | Qualified |
| 34     | Dimethoate                                                                                                       | mg/kg | WO. 2        | No Detection      | Qualified |
| 35     | Chlorpyrifos                                                                                                     | mg/kg | W0.2         | No Detection      | Qualified |
| 36     | Carbofuran                                                                                                       | mg/kg | WO. 1        | No Detection      | Qualified |
| 37     | Triazophos                                                                                                       | mg/kg | W0.2         | No Detection      | Qualified |
| 39     | Acephate                                                                                                         | mg/kg | WO. 1        | No Detection      | Qualified |
| 40     | Fenitrothion                                                                                                     | mg/kg | W0.5         | No Detection      | Qualified |
| 41     | Sign                                                                                                             | /     | GB7718-2011  | Meet the Standard | Qualified |
| Result | <p><b>The inspected items of this product are qualified.</b></p> <p style="text-align: right;">Date 5/5/2018</p> |       |              |                   |           |

Auditor: Zien Li

Chief inspector: Yang Ma
