# Supplementary material for: Asparagus officinalis Exhibits Anti-Tumorigenic and Anti-Metastatic Effects in Ovarian Cancer
Source: Frontiers journal article supplement (doi:10.3389/fonc.2021.688461), 2021-07-14
Supplement: Data_Sheet_2.PDF [file Data_Sheet_2.PDF]

## Supplemental table 2. Pesticide test report\*

| Number | Project               | Unit  | Standard   | Result       | Decision  |
|--------|-----------------------|-------|------------|--------------|-----------|
| 29     | Hexachlorocyclohexane | mg/kg | $\leq 0.2$ | No Detection | Qualified |
| 30     | Chlorophenothane      | mg/kg | $\leq 0.2$ | No Detection | Qualified |
| 31     | Dicofol               | mg/kg | $\leq 1.0$ | No Detection | Qualified |
| 32     | Fenvalerate           | mg/kg | $\leq 0.5$ | No Detection | Qualified |
| 33     | Dichlorvos            | mg/kg | $\leq 0.1$ | No Detection | Qualified |
| 34     | Dimethoate            | mg/kg | $\leq 0.2$ | No Detection | Qualified |
| 35     | Chlorpyrifos          | mg/kg | $\leq 0.2$ | No Detection | Qualified |
| 36     | Carbofuran            | mg/kg | $\leq 0.1$ | No Detection | Qualified |
| 37     | Triazophos            | mg/kg | $\leq 0.2$ | No Detection | Qualified |
| 39     | Acephate              | mg/kg | $\leq 0.1$ | No Detection | Qualified |
| 40     | Fenitrothion          | mg/kg | $\leq 0.5$ | No Detection | Qualified |

\* This table is a part of translation from Supplemental table 1, and only shows the results of pesticide in ASP.
